# Supplementary material for: Real-time high-resolution CO2 geological storage prediction using nested Fourier neural operators
Source: Royal Society of Chemistry journal article supplement (doi:10.1039/d2ee04204e), 2023-01-01
Supplement: d2ee04204e1.pdf [file d2ee04204e1.pdf]

1        Electronic Supplementary Information (ESI) for  
2        “Real-time High-resolution CO<sub>2</sub> Geological Storage  
3        Prediction using Nested Fourier Neural Operators”

4        Gege Wen,<sup>a\*</sup> Zongyi Li,<sup>b</sup> Qirui Long,<sup>a</sup> Kamyar Azizzadenesheli,<sup>c</sup>  
          Anima Anandkumar,<sup>b,c</sup> Sally M. Benson<sup>a</sup>

<sup>a</sup>Energy Sciences and Engineering,  
          Stanford University, Stanford, 94305, CA, USA

<sup>b</sup>Computing and Mathematical Sciences,  
          California Institute of Technology, Pasadena, 91125, CA, USA

<sup>c</sup>NVIDIA Corporation, Santa Clara, 95051, CA, USA

          \*Corresponding author: gegewen@stanford.edu.

5        **This PDF file includes:**

6        Supplementary Text

7        Figs. S1 to S2

8        Tables S1 to S7

9        References 1 to 23

## 10 Supplementary Text

### 11 1 Governing equation

We consider the immiscible multiphase flow problem with  $CO_2$  and water in the context of  $CO_2$  geological storage. The multiphase flow is governed by the basic mass balance equations, and the general forms of mass accumulations are written as (1):

$$\frac{\partial M^\eta}{\partial t} = -\nabla \cdot \mathbf{F}^\eta + q^\eta, \quad (1)$$

12 where  $\eta$  denotes component of  $CO_2$  or *water*,  $\mathbf{F}$  denotes the flux, and  $q$  denotes the source  
13 term. For each component, the mass accumulation term is summed over phase  $p = w$  (wetting)  
14 or  $n$  (non-wetting)

$$M^\eta = \varphi \sum_p S_p \rho_p X_p^\eta. \quad (2)$$

15 Here  $\varphi$  is the porosity,  $S_p$  is the saturation of phase  $p$ , and  $X_p^\eta$  is the mass fraction of component  
16  $\eta$  in phase  $p$ . Component *water* is the wetting phase in most storage formations with siliciclastic  
17 rocks (2). Meanwhile,  $CO_2$  and *water* have mutual solubility; therefore, a small amount of  $CO_2$   
18 dissolves into the wetting phase, and a small amount of *water* vaporizes into the non-wetting  
19 phase.

20 For both components, the advective mass flux  $\mathbf{F}^\eta|_{adv}$  is obtained by summing over phases  
21  $p$ ,

$$\mathbf{F}^\eta|_{adv} = \sum_p X^\eta \mathbf{F}_p = \sum_p X^\eta \left( -k \frac{k_{r,p} \rho_p}{\mu_p} (\nabla P_p - \rho_p \mathbf{g}) \right) \quad (3)$$

22 where each individual phase flux  $\mathbf{F}_p$  is governed by the multiphase flow extension of Darcy's  
23 law derived from the Navier-Stokes equation (3).  $k$  denotes the absolute permeability,  $k_{r,p}$  is the  
24 relative permeability of phase  $p$  that non-linearly depends on  $S_p$ ,  $\mu_p$  is the viscosity of phase  $p$   
25 that depends on  $P_p$ , and  $\mathbf{g}$  is the gravitational acceleration.

Due to the effect of capillarity, the fluid pressure  $P_p$  of each phase is

$$P_n = P_w + P_c \quad (4)$$

$$P_w = P_w \quad (5)$$

26 where the capillary pressure  $P_c$  is a non-linear function of  $S_p$ . Additionally, porosity  $\varphi$ , density  
27  $\rho_p$ , and the flow composition in Equation 2 and Equation 3 are also non-linear functions that  
28 depend on  $P_p$ .

## 2 Local Grid Refinement

We inject CO<sub>2</sub> into a 3D saline formation with multiple vertical injection wells. The reservoir is 160,000 m × 160,000 m × 100 m with a dip angle along the  $x$ -axis. The large spatial domain is chosen to mimic saline formations with infinite-acting boundaries; no flow boundary conditions are used for the top and bottom of the formation. On the global level (level 0), we used a grid resolution of 1,600 m × 1,600 m × 20 m to simulate the entire reservoir domain.

Each reservoir has 1 to 4 injection wells. Around each injection well, we apply high-resolution local refinements to capture the multi-phase flow processes. Specifically, since CO<sub>2</sub> is lighter than the formation fluid, the CO<sub>2</sub> plume will migrate upward due to gravity forces. As shown in the sensitivity analysis presented in (4), large grid thicknesses, such as the 20 m at level 0, will suppress gravity override and leads to underestimation of the plume footprint. In addition, the injection of CO<sub>2</sub> leads to rapid near-well pressure buildup. Using large lateral grids will greatly underestimate the maximum pressure buildup. Large lateral grids will also ignore the dry-out zone near the injection wells (5). Therefore, we gradually refine the grid cell size from 1,600 m × 1,600 m × 20 m to 20 m × 20 m × 2 m, and named each refinement from level 1 being the coarsest to level 4 being the finest. We refined the entire reservoir depth along the  $z$ -axis in levels 1-4 in order to ensure that the gravity override effect is always modeled by high-resolution grids. We chose the finest level grid thickness of 2 m as it provides decent estimates of the plume migration process. For example, as shown in (4), the plume radius error simulated by 2 m-thick grids is within 3% compared to the converged grid thickness of 0.5 m. The injection wells are placed in the middle of level 4. The level 1 refinements never overlap with each other. Table S1 summarizes detailed information for each level, and Figure S1 provides visualizations for levels 0 to 4 grid in a 4-well reservoir.

As for the  $x$  and  $y$ -axis, we designed the LGRs so that the CO<sub>2</sub> plume always stays within levels 1 to 4. Specifically, levels 2 to 4 are placed on the right-hand side of level 1 (Figure S1) because the simulated reservoir dips downwards along the  $x$ -axis. CO<sub>2</sub> is more likely to migrate up-dip, especially for high permeable reservoirs. This design ensures the CO<sub>2</sub> gas saturation plume never enters the level 0 grids. Overall, by using this four-level grid refinement on the  $x$ ,  $y$ , and  $z$ -axis, we accurately captured the CO<sub>2</sub> plume migration, near well pressure response, as well as far-field pressure inference in multi-well reservoirs.

## 59 **3 Data set generation**

60 To demonstrate the potential to make the Nested FNO a general-purpose numerical simulator  
61 alternative, we sampled a wide range of inputs to cover most realistic scenarios for CO<sub>2</sub> injec-  
62 tion into saline formations. This differs from most ‘surrogate’ modeling approaches with fixed  
63 reservoir conditions and permeability maps constrained by a prior. The following sections intro-  
64 duce the sampling ranges for reservoir conditions, injection schemes, and permeability fields.  
65 Sampling ranges are summarized in Table S2.

### 66 **3.1 Reservoir conditions**

67 We sample the reservoir depth from 800 m to 4,500 m. For the upper bound, injecting deeper  
68 than 800 m ensures that the CO<sub>2</sub> plume stays in the supercritical state. For the lower bound,  
69 our sampling range is deeper than commonly used ranges for CCS (~ 3,000 m) to include  
70 deep offshore formations such as in the Gulf of Mexico. Reservoir temperatures are calculated  
71 according to the reservoir depth and a geothermal gradient variable, which we sampled from 15  
72 to 35 C° per km. Within each formation, we assume isothermal conditions. Deeper reservoirs  
73 lead to higher initial pressures and temperatures, which in turn introduce a more diverse range  
74 of CO<sub>2</sub> properties (e.g., density, solubility, and viscosity).

75 Our data set also considers a range of reservoir dip angles. Since CO<sub>2</sub> is lighter than forma-  
76 tion fluid, it would naturally migrate up-dip. The influence on plume migration is particularly  
77 significant for large dip angles and high permeability formations. We sampled dip angles from  
78 0 to 2° to consider this effect and then discarded the reservoirs that are shallower than 800m or  
79 deeper than 4,500 m. The dip angle is applied to the  $x$ -axis, and the initial hydrostatic pressure  
80 in each cell is assigned according to the cell depth. Figure 1 in the main manuscript document  
81 demonstrates a reservoir with four injection wells, where the deepest and shallowest injection  
82 depths are more than 1,000 meters apart vertically due to the dip angle. As a result, the plume  
83 migration and pressure buildup around these two wells are influenced by significantly different  
84 reservoir conditions.

### 85 **3.2 Injection scenarios**

86 We randomly place one to four wells in each reservoir. Each well is at least 5,000 m away from  
87 the reservoir boundaries to avoid pressure influence. Each well has a constant injection rate

88 sampled from 0.5 to 2 MT/year over 30 years. We also sampled perforation lengths from 20 m  
89 to 100 m for each injection well and randomly placed the perforation interval along the well.

### 90 **3.3 Permeability fields**

91 To generate the 3D heterogeneous permeability fields, we used a modified version of Stanford  
92 Geostatistical Modeling Software (SGeMS) (6) to create random media according to 3D spatial  
93 correlations. For each permeability field, we sampled random correlation lengths on the  $x$ -axis  
94 from 800 m to 4,000 m,  $y$ -axis from 800 m to 4,000 m, and  $z$ -axis from 4 m to 20 m. These  
95 spatial correlation ranges are chosen to cover typical depositional environments (i.e., shoreface,  
96 deltaic, marginal marine) found in existing CO<sub>2</sub> storage and hydrocarbon reservoirs (7–11). The  
97 random field is generated at the resolution of level 2 and subsequently up-sampled for levels 0-1  
98 level and down-sampled for levels 3-4 using tri-linear interpolation. Note that the up-sampling  
99 and down-sampling of the permeability map is *not* performed to capture the flow character-  
100 istics. Instead, it simply re-grids the random field to another resolution while maintaining the  
101 spatial correlations for training. This is different from an ‘up-scaling’ context, where the coarser  
102 permeability field is expected to capture the flow of the finer permeability field.

103 Then, we scaled the distribution of each permeability field according to a pair of the ran-  
104 domly sampled  $\ln$  permeability mean and  $\ln$  permeability standard deviation (Table S2). The  
105 maximum cell permeability in the data set is 14 Darcy, and the minimum is kept at 0.1 mD.  
106 Figure 1 (main text) shows an example of the permeability field.

## 107 **4 Numerical simulation setting**

108 We use a full physics numerical simulator, ECLIPSE (e300), to solve the governing PDEs.  
109 ECLIPSE uses the finite difference method with upstream weighting for spatial discretiza-  
110 tion and the fully implicit method for temporal discretization (12). The benchmark study by  
111 Class et al. (13) compared a wide variety of numerical simulators for CO<sub>2</sub> storage problems  
112 (i.e., ECLIPSE, TOUGH2 (14), GEM-CMG (15)). They found that ECLIPSE has leading  
113 computational performance for compositional multiphase flow among the studied simulators.  
114 Therefore, we chose ECLIPSE to generate the training dataset in this study. ECLIPSE uses  
115 the non-conforming grid technique to simulate the domain with local grid refinement. We do  
116 not explicitly simulate molecular diffusion and hydrodynamic dispersion. However, numeri-  
117 cal simulation results include some unavoidable numerical diffusion and dispersion resulting

118 from finite difference gradient approximation. Since we applied LGRs around each injection  
119 well, the number of cells in each reservoir ranges from  $\sim 0.3$  million to  $\sim 1$  million, depending  
120 on the number of injection wells. We run each ECLIPSE numerical simulation on 20 parallel  
121 Intel®Xeon®E5-2640 CPU using Stanford University’s HPC cluster. The average ECLIPSE run  
122 times are summarized in Table S6 (b).

123 Corey’s curve and Leverette-J function scaling is used for relative permeability and capil-  
124 lary pressure. Relative permeability curves control the mobility of the liquid and the gas phase.  
125 Lower irreducible water saturation generally leads to more compact CO<sub>2</sub> plumes compared to  
126 higher irreducible water saturation (16, 17). Capillary pressure curves describe the capillary  
127 entry pressure and the rate of capillary pressure rising as CO<sub>2</sub> invades rock pores. It is also an  
128 important measurement of the wettability of the reservoir (18–20). In our previous work, we  
129 demonstrated that these curves could also be variables in deep learning models by sampling  
130 the irreducible water saturation and the scaling factor for capillary pressure curves (21, 22).  
131 Since the methodology of this paper focuses on predicting temporal-3D outputs with locally re-  
132 fined grids and multiple injection wells, we chose to prioritize incorporating injection scenarios,  
133 reservoir conditions, and permeability fields instead of rock properties in our training dataset;  
134 however, rock properties can be incorporated using the same approach described in (21, 22) in  
135 future work.

136 After running the numerical simulation, we extract 24-time snapshots for gas saturation  
137 and pressure buildup during 30 years of injection. We sampled the time snapshots with higher  
138 frequencies at the beginning of the injection and lower frequencies near the end of the injection.  
139 This technique is commonly used in numerical simulations to guide engineering decisions.

140 The data set includes 3011 cases for level 0 and 7374 for levels 1-4 because each reservoir  
141 can have one to four injection wells. We then split the data into training/validation/testing sets  
142 at an 8/1/1 ratio, which gives us 2408/301/302 for level 0 and 5916/731/727 for LGR models.

## 143 **5 Fourier Neural Operator**

144 The computational domain of the Nested Fourier Neural Operator (FNO) is a 3D space with  
145 time,  $D = \Omega \times T$ , where  $T$  is the time interval of 30 years and  $\Omega$  is the 3D spatial domain.  
146 The Nested FNO consists of nine FNOs for five levels of sub-domains where each subdomain  
147 corresponds to a level of grid refinement. The inputs and outputs are functions defined on the  
148 4D domain from the corresponding function spaces  $\mathcal{A} = \mathcal{U} = L^\infty(D)$ .

149 Each FNO model learns an infinite-dimensional-space mapping from a finite collection of  
 150 input-output observations (i.e. data set  $\{a_j, u_j\}_{j=1}^N$ ). We use  $n$ -point space-time discretization  
 151  $D_j = \{\xi_1, \dots, \xi_n\} \subset D$ , where  $\xi = (\omega, t)$ , to numerically represent  $a_j|_{D_j} \in \mathbb{R}^{n \times d_a}$  and  $u_j|_{D_j} \in$   
 152  $\mathbb{R}^{n \times d_u}$  so that  $a_j$  consists of the input coefficient functions and  $u_j$  consists of output functions  
 153 of gas saturation  $S$  and pressure buildup  $P$ . FNO is a type of neural operator (Definition 1)  
 154 where we use the Fourier integral kernel operator (Definition 2) as the linear integral operator  
 155 to achieve efficient and accurate training.

156 **Definition 1** (Neural operator). A  $L$ -layered neural operator  $\mathcal{G}_\theta$  is defined as:

$$\mathcal{G}_\theta := \mathcal{Q} \circ (W_L + \mathcal{K}_L) \circ \dots \circ \sigma(W_1 + \mathcal{K}_1) \circ \mathcal{P}, \quad (6)$$

157 where  $\mathcal{P}$  is a pointwise operator that expands the input function to a higher co-dimension space,  
 158 parameterized with  $\mathcal{P} : \mathbb{R}^{d_a} \rightarrow \mathbb{R}^{d_l=1}$ . In each layer for  $l \in 1 \dots L$ ,  $\mathcal{K}$  is a linear integral oper-  
 159 ator,  $W$  is a linear matrix operator, and  $\sigma$  is a non-linear activation. Lastly,  $\mathcal{Q}$  is a pointwise  
 160 operator that projects the function to the output space, parameterized with  $\mathcal{Q} : \mathbb{R}^{d_l=L} \rightarrow \mathbb{R}^{d_u}$ .

161 All parameters in  $\mathcal{P}$ ,  $\mathcal{K}_l$ ,  $W_l$ , and  $\mathcal{Q}$  are learned through training. By stacking multiple  
 162 neural operator layers,  $\mathcal{G}_\theta$  can approximate the mapping of high dimensional functions with  
 163 strong non-linearity.

164 **Definition 2** (Fourier integral kernel operator). An integral kernel operator  $\mathcal{K}$  is defined by

$$(\mathcal{K}(v_l))(\xi) = \int_D \kappa(\xi, \xi') v_l(\xi') d\xi', \quad \forall \xi' \in D. \quad (7)$$

165 To efficiently parameterize kernel  $\mathcal{K}$ , the FNO method (23) represents  $v_l$  in the Fourier space  
 166 to directly parameterize  $\kappa$  by its Fourier coefficients:

$$(\mathcal{K}(v_l))(\xi) = \mathcal{F}^{-1}(R \cdot \mathcal{F}(v_l))(\xi), \quad \forall \xi \in D. \quad (8)$$

167 where  $R$  is the Fourier transform of a periodic function  $\kappa$ ,  $\mathcal{F}$  denotes a Fourier transform of a  
 168 function  $f : D \rightarrow \mathbb{R}^c$  and  $\mathcal{F}^{-1}$  is its inverse. To further improve computational efficiency and  
 169 reduce memory consumption, we truncate the Fourier series at a maximum number of modes  
 170 ( $k_{max}$ ), and then parameterize  $R$  with the truncated Fourier coefficients. Therefore, we can  
 171 implement  $R$  using a linear parameterization as

$$(R \cdot \mathcal{F}(v_l))_{k,i} = \sum_{j=1}^c R_{k,i,j} (\mathcal{F}(v_l))_{k,j}, \quad \forall k = 1, \dots, k_{max}, i = 1, \dots, c. \quad (9)$$

172 *Using the Fourier integral kernel operator as  $\mathcal{K}_{1\dots L}$  gives us the FNO architecture. Since the*  
173 *data is locally provided on uniform grids, we utilize Fast Fourier Transform (FFT) to implement*  
174 *and approximate the Fourier transform. The speed and low memory requirement of FFT make*  
175 *our proposed method computationally fast with a significantly low memory footprint. We denote*  
176 *FNO with  $\mathcal{G}$  (in short of  $\mathcal{G}_\theta$ ) throughout this paper.*

177 We summarized the parameters in the following tables: level 0 (Table S3), level 1 (Table S4),  
178 and levels 2 to 4 (Table S5). We used 4 Fourier layers for each sub-model with a width of 28.  
179 The modes  $(t, x, y, z)$  are  $(4, 20, 20, 2)$  for the level 0 and  $(6, 10, 10, 10)$  for levels 1 to 4.

## 180 **6 Training procedure**

181 We use Nvidia A100-SXM GPUs for the training. Each model fits into the GPU with a batch  
182 size of one. We use the relative  $l_2$ -loss function for the training because it provides normalized  
183 loss across cases, leading to excellent gradient propagation compared to a vanilla  $l_2$ -loss or  
184 RMSE error. Each model was trained for 30 and 40 epochs and fine-tuned for around 10 epochs  
185 until the validation set error plateaus. Instead of relative  $l_2$ -loss, we monitored the model level  
186 plume gas saturation error (main text, Equation 4) and relative pressure buildup error (main text,  
187 Equation 3) on the validation set as an indicator of when to stop training. We do not monitor the  
188 relative  $l_2$ -loss because it is normalized over the sample’s norm, making the magnitudes carry  
189 different meanings among different refinement levels.

190 Note that the numerical simulator domains at levels 0 to 3 are annular because they do  
191 not include information at the finer refinement levels. To help with the FNO learning (which  
192 prefers continuous functions), we construct the continuous training domains by down-sampling  
193 the information from the finer LGRs to populate the annular domains. Our experiments show  
194 that the continuous training domains provide more efficient learning than the annular simulator  
195 domains. The down-sampled information is only used during the training and is not reported in  
196 the final prediction. Figure S2 shows the simulator domain and training domain at each level.

## 197 **7 Speedup analysis**

198 Once the Nested FNO model is trained, we can directly use it as a numerical simulator alterna-  
199 tive for CO<sub>2</sub> gas saturation and pressure buildup prediction in 3D saline formations. Therefore,  
200 we compared the ML model prediction time with the numerical simulation time to compute



201 the computational efficiency speed-up. We summarized each model’s training and prediction  
202 times in the Nested FNO in Table S6 (a). The machine learning models are evaluated on Nvidia  
203 A100-SXM GPUs the prediction time is calculated by taking the average over 1,000 cases. All  
204 models take  $\sim 0.005$  s to evaluate with negligible variances. The prediction time depends on the  
205 number of injection wells:  $t_{total} = t_{global} + n_{well} \times \sum_{i=1}^4 t_i$ . We run each ECLIPSE numerical  
206 simulation on 20 parallel Intel® Xeon® E5-2640 CPU using Stanford HPC cluster. The run time  
207 also depends on the number of injection wells since more wells lead to more cells.

208 Table S6 (b) shows that the Nested FNO provides  $4 \times 10^5$  to  $7 \times 10^5$  times speed-up com-  
209 pared to traditional numerical simulation. Interestingly, four-well cases with larger cell counts  
210 have the most significant speed-up. The advantage of using Nested FNO is more prominent  
211 with higher dimensional cases, e.g., more injection wells or levels of refinements. In addition,  
212 Nested FNO can predict pressure buildup or gas saturation separately, whereas numerical sim-  
213 ulation always calculates all variables regardless of whether they are needed. The speed-up is  
214 calculated considering separate predictions for gas saturation and pressure buildup.

## 215 **8 Accuracy summary**

216 Table S7 shows an accuracy summary for train, validation, and test sets in the simulator domain,  
217 the training domain with separate prediction, and the training domain with sequential prediction.

## 218 **9 Probabilistic assessment**

219 We use Nested FNO to conduct probabilistic assessments on CO<sub>2</sub> plume footprint and maxi-  
220 mum pressure buildup. We consider CO<sub>2</sub> injection through 4 injection wells where each well  
221 injects at a 1MT/year rate. All wells inject through a perforation located at the bottom 20  
222 meters of the reservoir. We generated 1,000 permeability realizations where the permeability  
223 average and standard deviation for each map are 85mD and 100mD, respectively. The corre-  
224 lation lengths on  $x$ ,  $y$ , and  $z$  directions are 2000, 4000, and 20 meters, respectively. The 10  
225 realizations shown in Figure 4 (main text) were taken from the same injection well.

226 CO<sub>2</sub> plume footprint is defined as the area of land under the separate phase CO<sub>2</sub> plume,  
227 which has a gas saturation larger than 0.01. We calculate the plume footprint using the Nested  
228 FNO’s gas saturation prediction and the  $xy$ -cross section area of each grid cell. The plume  
229 footprint reported in Figure 4 (main text) is the reservoir’s total plume footprint; the maximum

230 pressure buildup reported in Figure 4 (main text) is the reservoir's maximum.

231 **Fig. S1.**

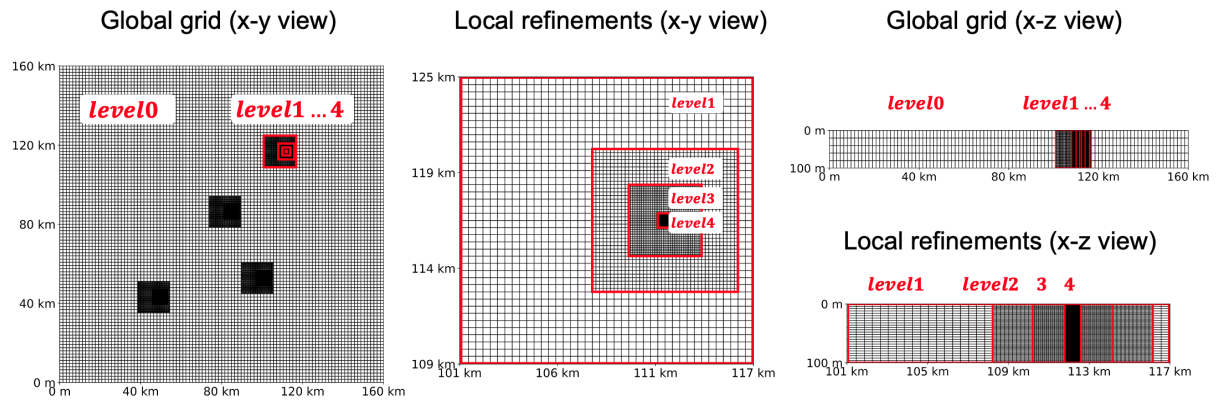

Figure S1: Grid visualizations for the entire reservoir (x-y view), local refinements around the injection well (x-y view), entire reservoir (x-z view) and local refinements around the injection well (x-z view).

232 **Fig. S2.**

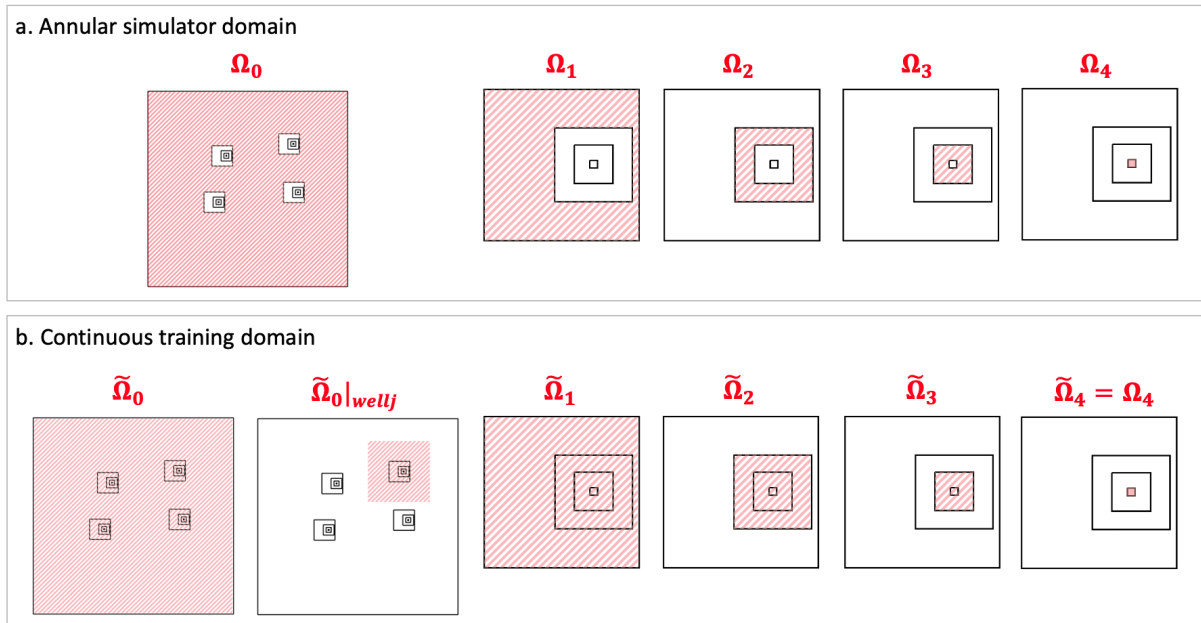

Figure S2: Simulator domain and training domain for each level

**Table S1.**

Table S1: Spatial dimension, cell size, matrix dimension, and the number of cells for level 0-4 grids.

|         | Spatial dimension ( $m$ )           | Cell size ( $m$ )              | Matrix dim                | # of cells |
|---------|-------------------------------------|--------------------------------|---------------------------|------------|
| level 0 | $160,000 \times 160,000 \times 100$ | $1,600 \times 1,600 \times 20$ | $100 \times 100 \times 5$ | 50,000     |
| level 1 | $16,000 \times 16,000 \times 100$   | $400 \times 400 \times 4$      | $40 \times 40 \times 25$  | 40,000     |
| level 2 | $8,000 \times 8,000 \times 100$     | $200 \times 200 \times 2$      | $40 \times 40 \times 50$  | 80,000     |
| level 3 | $4,000 \times 4,000 \times 100$     | $100 \times 100 \times 2$      | $40 \times 40 \times 50$  | 80,000     |
| level 4 | $800 \times 800 \times 100$         | $20 \times 20 \times 2$        | $40 \times 40 \times 50$  | 80,000     |

**Table S2.**

Table S2: Variables parameters and sample ranges used for generating the input data set.

| Variable type    | Sampling parameter          | Distribution                     | Unit         |
|------------------|-----------------------------|----------------------------------|--------------|
| Permeability map | <i>x</i> -axis correlation  | $X \sim \mathcal{U}[800, 4000]$  | m            |
|                  | <i>y</i> -axis correlation  | $X \sim \mathcal{U}[800, 4000]$  | m            |
|                  | <i>z</i> -axis correlation  | $X \sim \mathcal{U}[4, 20]$      | m            |
|                  | reservoir permeability mean | $X \sim \mathcal{U}[4.09, 5.01]$ | ln <i>mD</i> |
|                  | reservoir permeability std  | $X \sim \mathcal{U}[0.25, 1]$    | ln <i>mD</i> |
| Reservoir cond.  | Reservoir center depth      | $X \sim \mathcal{U}[800, 4500]$  | m            |
|                  | Geothermal gradient         | $X \sim \mathcal{U}[15, 35]$     | °C/km        |
|                  | Dip angle                   | $X \sim \mathcal{U}[0, 2]$       | °C/km        |
| Injection design | # of wells                  | $n \in \{1, 2, 3, 4\}$           | -            |
|                  | Injection rate              | $X \sim \mathcal{U}[0.5, 2]$     | MT/y         |
|                  | Perforation thickness       | $X \sim \mathcal{U}[20, 100]$    | m            |
|                  | Perforation location        | Randomly placed                  | -            |

**Table S3.**

Table S3: FNO model parameters for the level 0 level. The `Padding` denotes a padding operator that accommodates the non-periodic boundaries; `Linear` denotes the linear transformation to lift the input to the high dimensional space, and the projection back to original space; `Fourier4d` denotes the 4D Fourier operator; `Conv1d` denotes the bias term; `Add` operation adds the outputs together; `GELU` denotes a Gaussian Error Linear Units layer.

| Layer        | Operation                 | Output Shape           |
|--------------|---------------------------|------------------------|
| Input        | -                         | (24, 100, 100, 5, 8)   |
| Padding      | Padding (8)               | (40, 116, 116, 21, 8)  |
| Lifting      | Linear                    | (40, 116, 116, 21, 28) |
| Fourier 1    | Fourier4d/Conv1d/Add/GELU | (40, 116, 116, 21, 28) |
| Fourier 2    | Fourier4d/Conv1d/Add/GELU | (40, 116, 116, 21, 28) |
| Fourier 3    | Fourier4d/Conv1d/Add/GELU | (40, 116, 116, 21, 28) |
| Fourier 4    | Fourier4d/Conv1d/Add      | (40, 116, 116, 21, 28) |
| De-padding   | Depadding (8)             | (24, 100, 100, 5, 28)  |
| Projection 1 | Linear                    | (24, 100, 100, 5, 112) |
| Projection 2 | Linear                    | (24, 100, 100, 5, 1)   |

**Table S4.**

Table S4: FNO model parameters for the level 1 level. The `Padding` denotes a padding operator that accommodates the non-periodic boundaries; `Linear` denotes the linear transformation to lift the input to the high dimensional space, and the projection back to original space; `Fourier4d` denotes the 4D Fourier operator; `Conv1d` denotes the bias term; `Add` operation adds the outputs together; `GELU` denotes a Gaussian Error Linear Units layer.

| Layer        | Operation                 | Output Shape          |
|--------------|---------------------------|-----------------------|
| Input        | -                         | (24, 40, 40, 25, 9)   |
| Padding      | Padding (8)               | (40, 56, 56, 41, 9)   |
| Lifting      | Linear                    | (40, 56, 56, 41, 28)  |
| Fourier 1    | Fourier4d/Conv1d/Add/GELU | (40, 56, 56, 41, 28)  |
| Fourier 2    | Fourier4d/Conv1d/Add/GELU | (40, 56, 56, 41, 28)  |
| Fourier 3    | Fourier4d/Conv1d/Add/GELU | (40, 56, 56, 41, 28)  |
| Fourier 4    | Fourier4d/Conv1d/Add      | (40, 56, 56, 41, 28)  |
| De-padding   | Depadding (8)             | (24, 40, 40, 25, 28)  |
| Projection 1 | Linear                    | (24, 40, 40, 25, 112) |
| Projection 2 | Linear                    | (24, 40, 40, 25, 1)   |



**Table S5.**

Table S5: FNO model parameters for levels 2-4. The `Padding` denotes a padding operator that accommodates the non-periodic boundaries; `Linear` denotes the linear transformation to lift the input to the high dimensional space, and the projection back to original space; `Fourier4d` denotes the 4D Fourier operator; `Conv1d` denotes the bias term; `Add` operation adds the outputs together; `GELU` denotes a Gaussian Error Linear Units layer.

| Layer        | Operation                 | Output Shape          |
|--------------|---------------------------|-----------------------|
| Input        | -                         | (24, 40, 40, 50, 9)   |
| Padding      | Padding (8)               | (40, 56, 56, 66, 9)   |
| Lifting      | Linear                    | (40, 56, 56, 66, 28)  |
| Fourier 1    | Fourier4d/Conv1d/Add/GELU | (40, 56, 56, 66, 28)  |
| Fourier 2    | Fourier4d/Conv1d/Add/GELU | (40, 56, 56, 66, 28)  |
| Fourier 3    | Fourier4d/Conv1d/Add/GELU | (40, 56, 56, 66, 28)  |
| Fourier 4    | Fourier4d/Conv1d/Add      | (40, 56, 56, 66, 28)  |
| De-padding   | Depadding (8)             | (24, 40, 40, 50, 28)  |
| Projection 1 | Linear                    | (24, 40, 40, 50, 112) |
| Projection 2 | Linear                    | (24, 40, 40, 50, 1)   |

**Table S6.**

Table S6: (a). Prediction time, training time, and the number of parameters for levels 0-4 models. The prediction time is calculated based on an average of 250 runs. (b) Speed up calculation for ECLIPSE vs. Nested FNO. We show the number of cells and average run time of the ECLIPSE simulation and the Nested FNO prediction time, both averaging over 250 cases. The speed-up is calculated for predicting gas saturation and pressure buildup separately.

(a)

| Model   | Prediction (s) | Training (hr/epoch) | # of parameter |
|---------|----------------|---------------------|----------------|
| level 0 | 0.005          | 0.96                | 80,288,461     |
| level 1 | 0.005          | 1.43                | 150,534,889    |
| level 2 | 0.005          | 2.20                | 150,534,889    |
| level 3 | 0.005          | 2.20                | 150,534,889    |
| level 4 | 0.005          | 2.20                | 150,534,889    |

(b)

| # of Wells | # of Cells | ECLIPSE (hr) | Nested FNO (s) | Speed-up           |
|------------|------------|--------------|----------------|--------------------|
| 1          | 296,300    | 2.75         | 0.025          | $3.96 \times 10^5$ |
| 2          | 542,600    | 6.43         | 0.045          | $5.14 \times 10^5$ |
| 3          | 788,900    | 11.00        | 0.065          | $6.09 \times 10^5$ |
| 4          | 1,035,200  | 15.93        | 0.085          | $6.75 \times 10^5$ |

**Table S7.**

Table S7: Accuracy summary for train, validation, and test sets in the simulator domain, the training domain with separate prediction, and the training domain with sequential prediction.

## (a) Pressure buildup

| Simulator domain            | Train (%) | Validation (%) | Test (%) |
|-----------------------------|-----------|----------------|----------|
| $\delta^P$                  | 0.34      | 0.48           | 0.47     |
| Training domain, separate   | Train (%) | Validation (%) | Test (%) |
| $\delta_0^P$                | 0.02      | 0.02           | 0.02     |
| $\delta_1^P$                | 0.09      | 0.11           | 0.10     |
| $\delta_2^P$                | 0.15      | 0.16           | 0.16     |
| $\delta_3^P$                | 0.14      | 0.14           | 0.14     |
| $\delta_4^P$                | 0.42      | 0.47           | 0.45     |
| Training domain, sequential | Train (%) | Validation (%) | Test (%) |
| $\delta_0^P$                | 0.02      | 0.02           | 0.02     |
| $\delta_1^P$                | 0.08      | 0.15           | 0.16     |
| $\delta_2^P$                | 0.19      | 0.31           | 0.30     |
| $\delta_3^P$                | 0.38      | 0.50           | 0.51     |
| $\delta_4^P$                | 0.59      | 0.81           | 0.82     |

## (b) Gas saturation

| Simulator domain            | Train (%) | Validation (%) | Test (%) |
|-----------------------------|-----------|----------------|----------|
| $\delta^S$                  | 1.16      | 1.81           | 1.79     |
| Training domain, separate   | Train (%) | Validation (%) | Test (%) |
| $\delta_1^S$                | 0.78      | 1.32           | 1.27     |
| $\delta_2^S$                | 0.84      | 1.02           | 1.00     |
| $\delta_3^S$                | 0.48      | 0.61           | 0.61     |
| $\delta_4^S$                | 0.67      | 0.79           | 0.74     |
| Training domain, sequential | Train (%) | Validation (%) | Test (%) |
| $\delta_1^S$                | 0.73      | 1.36           | 1.39     |
| $\delta_2^S$                | 1.17      | 1.88           | 1.91     |
| $\delta_3^S$                | 1.00      | 1.74           | 1.77     |
| $\delta_4^S$                | 1.16      | 1.85           | 1.82     |

## References

- 241 1. K. Pruess, C. M. Oldenburg, G. Moridis, Tough2 user's guide version 2, *Tech. rep.*,  
242 Lawrence Berkeley National Lab.(LBNL), Berkeley, CA (United States) (1999).
- 243 2. R. Pini, S. C. Krevor, S. M. Benson, Capillary pressure and heterogeneity for the CO<sub>2</sub>/water  
244 system in sandstone rocks at reservoir conditions, *Advances in Water Resources* **38**, 48  
245 (2012).
- 246 3. M. J. Blunt, *Multiphase flow in permeable media: A pore-scale perspective* (Cambridge  
247 university press, 2017).
- 248 4. G. Wen, S. M. Benson, CO<sub>2</sub> plume migration and dissolution in layered reservoirs, *Inter-  
249 national Journal of Greenhouse Gas Control* **87**, 66 (2019).
- 250 5. L. André, Y. Peysson, M. Azaroual, Well injectivity during co2 storage operations in deep  
251 saline aquifers—part 2: Numerical simulations of drying, salt deposit mechanisms and role  
252 of capillary forces, *International Journal of Greenhouse Gas Control* **22**, 301 (2014).
- 253 6. N. Remy, A. Boucher, J. Wu, *Applied Geostatistics with SGeMS: A User's Guide* (Cam-  
254 bridge University Press, 2009).
- 255 7. F. P. Shepard, D. G. Moore, Central texas coast sedimentation: Characteristics of sedimen-  
256 tary environment, recent history, and diagenesis: Part 1, *AAPG Bulletin* **39**, 1463 (1955).
- 257 8. T. Ito, T. Nakajima, Z. Xue, Geological reservoir characterization and modelling of a co2  
258 storage aquifer: A case study of the nagaoka site, japan, *Energy Procedia* **114**, 2792 (2017).
- 259 9. Y. Z. Ma, X. Zhang, *Quantitative geosciences: Data analytics, geostatistics, reservoir  
260 characterization and modeling* (Springer, 2019).
- 261 10. R. S. Jayne, H. Wu, R. M. Pollyea, Geologic co2 sequestration and permeability uncertainty  
262 in a highly heterogeneous reservoir, *International Journal of Greenhouse Gas Control* **83**,  
263 128 (2019).
- 264 11. M. Fawad, M. J. Rahman, N. H. Mondol, Seismic reservoir characterization of potential  
265 co2 storage reservoir sandstones in smeaheia area, northern north sea, *Journal of Petroleum  
266 Science and Engineering* **205**, 108812 (2021).

- 267 12. Schlumberger, Eclipse reservoir simulation software reference manual (2014).
- 268 13. H. Class, *et al.*, A benchmark study on problems related to co<sub>2</sub> storage in geologic forma-  
269 tions: summary and discussion of the results, *Computational geosciences* **13**, 409 (2009).
- 270 14. K. Pruess, The tough codes—a family of simulation tools for multiphase flow and transport  
271 processes in permeable media, *Vadose zone journal* **3**, 738 (2004).
- 272 15. C. M. Group, Gem user guide. (2006).
- 273 16. C. Doughty, K. Pruess, Modeling supercritical carbon dioxide injection in heterogeneous  
274 porous media, *Vadose Zone Journal* **3**, 837 (2004).
- 275 17. M. Flett, R. Gurton, I. Taggart, *SPE Asia Pacific Oil and Gas Conference and Exhibition*  
276 (OnePetro, 2004).
- 277 18. W.-J. Plug, J. Bruining, Capillary pressure for the sand–co<sub>2</sub>–water system under various  
278 pressure conditions. application to co<sub>2</sub> sequestration, *Advances in Water Resources* **30**,  
279 2339 (2007).
- 280 19. A. Al-Menhali, B. Niu, S. Krevor, Capillarity and wetting of carbon dioxide and brine  
281 during drainage in berea sandstone at reservoir conditions, *Water Resources Research* **51**,  
282 7895 (2015).
- 283 20. H. Wu, R. S. Jayne, R. M. Pollyea, A parametric analysis of capillary pressure effects  
284 during geologic carbon sequestration in a sandstone reservoir, *Greenhouse Gases: Science*  
285 *and Technology* **8**, 1039 (2018).
- 286 21. G. Wen, C. Hay, S. M. Benson, CCSNet: a deep learning modeling suite for CO<sub>2</sub> storage,  
287 *Advances in Water Resources* p. 104009 (2021).
- 288 22. G. Wen, Z. Li, K. Azzizadenesheli, A. Anandkumar, S. M. Benson, U-fno—an enhanced  
289 fourier neural operator-based deep-learning model for multiphase flow, *Advances in Water*  
290 *Resources* **163**, 104180 (2022).
- 291 23. Z. Li, *et al.*, Fourier neural operator for parametric partial differential equations, *arXiv*  
292 *preprint arXiv:2010.08895* (2020).
